1 A functional analysis of the contribution of climatic niche divergence to adaptive  
2 radiation

3 Alex R. Gunderson<sup>†\*</sup>, D. Luke Mahler<sup>§</sup>, and Manuel Leal<sup>¶</sup>

4

5 <sup>†</sup>Romberg Tiburon Center and Department of Biology, San Francisco State University,  
6 3150 Paradise Dr., Tiburon, California 94920 and <sup>‡</sup>Department of Integrative Biology,  
7 University of California, Berkeley, California 94720-3140

8 \*Corresponding author: e-mail: alexrgunderson@gmail.com

9 <sup>§</sup>Department of Ecology and Evolutionary Biology, University of Toronto, Toronto,  
10 Ontario, M5S 3B2 CA

11 <sup>¶</sup> Division of Biological Sciences, University of Missouri, 105 Tucker Hall, Columbia,  
12 MO 65211. Email: [lealm@missouri.edu](mailto:lealm@missouri.edu)

13

14 Running title: Physiology of adaptive radiation

15

16 Keywords: *Anolis*, thermal biology, physiology, thermal tolerance, thermal performance,  
17 evolutionary rates, sympatry, species richness

18

19

20 Data accessibility: If accepted, data herein will be archived at Dryad  
21 (<http://datadryad.org>)

22

23

## Abstract

Analyses of evolutionary radiations have traditionally focused on traits related to resource acquisition, habitat use, and mate choice. Nonetheless, incorporation of climatic niche divergence has become more common in recent years, driven by the development of correlative ecological niche models (ENMs) that allow niche characterization based solely on geo-referenced locality data. However, ENMs require no data on organismal traits that link climatic conditions to performance, and thus have little to say about how organisms phenotypically adapt to different climatic conditions, what the performance consequences of phenotypic divergence are, and how phenotypic divergence influences resource partitioning within communities of co-occurring species. Here, we conduct a functional (*i.e.*, physiological) analysis of climatic niche divergence within Greater Antillean *Anolis* radiations. We find that physiological divergence occurred repeatedly within these radiations, that there are performance consequences of physiological divergence within natural habitats, and that physiological divergence facilitates species co-existence within species-rich communities. We also use phylogenetic methods to compare rates of evolution of ecologically relevant physiological and morphological traits, and find that physiology has evolved either more slowly or as fast (but not faster) than morphology. Our analysis demonstrates the benefit of a functional approach to understanding macroevolutionary patterns of climatic niche divergence.

## Introduction

During adaptive radiations, the proliferation of species is accompanied by adaptive phenotypic diversification, leading to a pattern in which multiple closely related but ecologically distinct species coexist (Simpson 1953; Schluter 2000). The vast majority of research on adaptive radiation, and evolutionary radiation in general, has focused on morphological traits directly linked to resource acquisition, structural habitat use, and mating display (Schluter 2000; Seehausen et al. 2008; Fleishman et al. 2009; Arnegard et al. 2010). Classic examples include divergence in jaw morphology in African cichlids (Meyer 1993) and bill shape in Darwin's finches (Grant 1999) to specialize on different food sources, and body shape divergence in Caribbean *Anolis* lizards to specialize on different structural microhabitats (*e.g.*, twigs, trunks and grasses) (Williams 1983; Losos 2009).

In contrast, adaptation to aspects of the climatic environment, such as temperature and water availability, have traditionally received much less attention in studies of evolutionary radiations, particularly in animals (Schluter 2000). This has been changing in recent years due to the development of global scale climate databases and correlative ecological niche models (ENMs) that allow one to estimate parameters of a species' abiotic ecological niche based on geo-referenced species locality data (Peterson et al. 2011). Due largely to their relative ease of use and the fact that they facilitate the incorporation of ecologically intractable or understudied species into ecological and evolutionary analyses, ENMs are now commonly used to calculate rates and frequencies of climatic niche divergence and to infer adaptive diversification (Knouft et al. 2006; Warren et al. 2008; Quintero and Wiens 2013; Lawing et al. 2016).

However, ENMs also have several disadvantages that limit the inferences that can be drawn from their application (Guisan and Thuiller 2005; Kearney and Porter 2009; Buckley et al. 2010; Araújo and Peterson 2012; Alvarado-Serrano and Knowles 2014; Warren et al. 2014). For example, they provide no information about what phenotypic traits, if any, have evolved to facilitate the occupation of different climatic niches. In other words, functional analyses using the ENM approach alone are not possible (Buckley et al. 2010). In addition, the climatic data used in ENMs are typically collected at scales much larger than those at which organisms experience and utilize their habitats (Potter et al. 2013). Thus, allopatric populations from broadly different climates could actually experience very similar abiotic conditions because of differences in microhabitat use (Bogert 1949; Huey et al. 2003); conversely, different species that are broadly sympatric could actually experience very different abiotic conditions because of differential microhabitat use (Kaspari et al. 2015).

When species adapt to different climates, the phenotypes most likely to diverge are physiological traits related to tolerance for, and sensitivity to, abiotic conditions (Hochachka and Somero 2002). For example, physiological variation is extensive across environmental gradients (Levin et al. 2001; Hochachka and Somero 2002; Angilletta 2009; Sunday et al. 2011). Physiological divergence can also lead to reproductive isolation between populations (Matute et al. 2009; Keller and Seehausen 2012) and facilitate fine-scale resource partitioning among co-occurring taxa (Rand 1964), characteristics that can hypothetically facilitate adaptive radiation (Schluter 2000). Indeed, the evolution of thermal physiology is hypothesized to play an important role in the radiation of a number of groups including bolitoglossine salamanders (Wake 1987;

Kozak and Wiens 2007), *Liolaemus* lizards (Labra et al. 2009; Bonino et al. 2011; Pincheira-Donoso 2011), *Drosophila* flies (Kellermann et al. 2009) and *Petrolisthes* crabs (Stillman and Somero 2000). Still, a comprehensive understanding of the contribution of physiological adaptation to the process of adaptive radiation is currently lacking.

Greater Antillean *Anolis* lizards are a textbook example of adaptive radiation, best known for the repeated morphological evolution of distinct perch type (*i.e.*, structural microhabitat) specialists, known as ecomorphs (Williams 1983; Losos et al. 1998; Mahler et al. 2013). Nonetheless, morphological specialization cannot fully explain the Greater Antillean radiation because most cladogenic events are not associated with ecomorphological divergence (Losos 2009). Furthermore, many *Anolis* communities support more than one species of a given ecomorph (Williams 1983; Losos et al. 2003), and thus morphological specialization cannot fully explain the diversity of *Anolis* communities.

Climatic niche divergence is proposed to be a major contributor to the species richness of Greater Antillean anoles based primarily on body temperature and ENM studies (Ruibal 1961; Rand 1964; Heatwole et al. 1969; Williams 1972; Huey and Webster 1976; Losos et al. 2003; Knouft et al. 2006; Hertz et al. 2013; Algar and Mahler 2015). However, we know relatively little about how the occupation of different thermal niches has been facilitated by physiological evolution during this radiation (Muñoz et al. 2014), and the extent to which physiological divergence has facilitated the co-existence of species within diverse anole communities. For example, what components of physiology evolve during adaptive radiations? Additionally, what are the geographical patterns of physiological divergence? In other words, are physiologically divergent

species geographically separated, or do they occur sympatrically? The latter scenario would indicate that physiological divergence can promote the maintenance of high community-level diversity by facilitating species co-existence. Finally, how does the tempo of evolution of physiological traits compare to that of morphological traits important to divergence along other ecological axes (*e.g.*, the structural niche axis)?

Here, we take a functional approach to investigate the physiological and ecological consequences of climatic niche divergence in West Indian *Anolis* lizards. Our analyses focus primarily on the *cristatellus* species group from Puerto Rico, but we also conduct analyses that include data from other Puerto Rican anoles as well as species from St. Croix and Jamaica (Fig. 1). First, we use data from the *cristatellus* species group to investigate divergence in thermal physiology between species that occupy distinct thermal niches. Next, we integrate these data with measurements of operative thermal environments in Puerto Rico to explore the performance consequences of this physiological variation. We then consider geographical patterns of physiological trait divergence to evaluate the contribution of thermal adaptation to niche partitioning and community-level species co-existence across Puerto Rico and Jamaica. Finally, we conduct phylogenetically-based analyses of phenotypic rates of evolution with physiological and morphological traits to compare macro-evolutionary patterns of diversification between traits associated with divergence along the thermal and structural niche axes.

## *Methods*

### **STUDY SPECIES**

We measured physiological traits for a total of 304 individuals representing 16 species of anole from the islands of Puerto Rico, St. Croix (U.S. Virgin Islands), and Jamaica (Fig. 1; see Supplementary Table 1 for sample sizes and natural history information for each species). Nine species are from Puerto Rico, eight of which are members of the *crisatellus* species group that diverged *in situ* on the greater Puerto Rico bank following a single colonization event (Jackman et al. 1999; Losos 2009). According to recent phylogenetic analyses these species most likely fall into four sister-species pairs (Nicholson et al. 2005; Mahler et al. 2010; Gamble et al. 2014) (Fig. 1). Each species within a given pair occupies a different thermal niche (Rand 1964; Huey and Webster 1976; Hertz 1992b, a). We sampled six species from Jamaica, including five of the six extant endemic species on the island, plus the introduced *A. sagrei*. As with the Puerto Rican *crisatellus* group, all endemic Jamaican species evolved *in situ* as the result of a single colonization event (Jackman et al. 1999). Throughout, we focus primarily on the Puerto Rican *crisatellus* radiation because of the fortuitous pattern of species relationships (*i.e.*, four sister species pairs with different thermal niches) and because we have detailed measurements of operative thermal environments in Puerto Rico with which to investigate performance consequences of physiological divergence.

Experiments in Puerto Rico were conducted May 20 – June 20 2011, October 8-21 2011, and May 13-28 2012 at the Mata de Plátano field station in the Arecibo municipality (18.414037 N; 66.728582 W; elevation 150 m). Most lizard collection occurred at and around Mata de Plátano (*A. crisatellus*, *A. krugi*, *A. pulchellus*, and *A. culvieri*) and El Verde Research Station (18.322416 N; 65.818052 W, elevation 350 m; *A. gundlachi*, *A. evermanni*, and *A. stratulus*) along the north coast. Two species occur

only on the southwest coast (*A. poncensis* and *A. cooki*), and were collected at Bosque Estatal de Boquerón (17.936091 N; 67.192854 W, elevation 5 m) and Bosque Estatal de Guánica (17.963301 N; 66.889752 W, elevation 5 m), respectively. In Jamaica, animal collection and experiments occurred from February 25 – March 13 2013 at Green Castle Estates, a privately owned 1600 square acre farm and nature preserve in St. Mary Parish (18.287927 N; 76.807951 W, elevation 50 m). Prior to experiments, lizards were kept individually in plastic cages (18 x 11 x 15 cm) with a wooden dowel for a perch on an approximately 12L:12D light schedule. Lizards were watered daily and fed crickets or Phoenix worms every other day. The only exception was *A. acutus* from St. Croix (captured at 17.753274 N; 64.866563 W, elevation 172 m), which were brought back to Durham, NC and housed following Gunderson and Leal (2012).

## HEAT TOLERANCE

Heat tolerance ( $CT_{max}$ ) was measured following Leal and Gunderson (2012). Briefly, the tip of a thermocouple probe (~1.5 m, 40 gauge) was placed inside the cloaca and secured to the tail with surgical tape so that body temperature could be measured continuously during the experiment with a model HH603A Type T (sensitivity  $\pm 0.1^{\circ}\text{C}$ ) digital thermometer (Omega, Stamford, CT, USA). The lizard was loosely tethered to a piece of cardboard (29L, 21W cm) with dental floss looped around the waist and body temperatures were raised by placing lizards under a 150w double-mirror incandescent light bulb. Lizards were flipped onto their backs at one-degree intervals starting at  $34^{\circ}\text{C}$  to test righting ability. If the lizard righted itself, it was placed back under the light bulb and warmed to the next temperature. If not, the trial was terminated.  $CT_{max}$  was recorded



as the last temperature at which the lizard righted itself + 0.5°C (Leal and Gunderson 2012). Mean warming rates during experiments were very similar among species, ranging from 1.8 to 2.6°C/min (Fig. S1). All lizards were captured three days prior to  $CT_{\max}$  measurement. We modeled variation in  $CT_{\max}$  among species using Analysis of Variance (ANOVA), with separate analyses for the species on Puerto Rico and Jamaica. Data were log-transformed prior to analysis. Planned orthogonal contrasts were applied to test *a priori* predictions about divergence in  $CT_{\max}$  between sister species with different thermal niches (in Puerto Rico) and divergence among sympatric, morphologically similar species (Puerto Rico and Jamaica).

## SPRINT PERFORMANCE

Temperature-dependent sprint speeds were measured for thirteen species (*A. cuvieri*, *A. acutus*, and *A. valencienni* were excluded) following Gunderson and Leal (2012). Briefly, lizards were filmed at high speed (120 frames/s; Sony© Handycam, Tokyo, Japan) while sprinting up a 2 m wooden racetrack marked with a line every 12.5 cm. The ramp was set at a 37° angle as anoles will jump instead of run on a horizontal surface (A. Gunderson, personal observation). Videos were watched frame-by-frame to determine speed. Lizards were run 2-4 times at each temperature (two runs were the minimum, additional runs were added if the lizard stopped or jumped off of the track during a run). Runs for a lizard at a given temperature were a minimum of 40 minutes apart. Speed for a lizard at a given temperature was taken as the fastest 25 cm run at that temperature (Huey 1983; Losos 1990). In Puerto Rico, lizards were run at five body temperatures in the following randomized order: 32, 22, 27, 17, and 35°C. In Jamaica, lizards were run at the same

temperatures in the same order, except the 17°C temperature was excluded. All individuals were captured one day prior to the start of trials, and each temperature treatment was administered on a different day over five straight days (four days for Jamaican lizards). Body temperatures were achieved by placing lizards into a calibrated chilling-heating incubator (Cole-Parmer©, Vernon Hills, IL, USA) for 30 min prior to a run (Gunderson and Leal 2012).

The body temperature of maximum physiological performance (the “optimal temperature,”  $T_{opt}$ ) was estimated for each individual (sensu Logan et al. 2014). Thermal performance curves are non-linear (Angilletta 2009), and we initially fit two different non-linear models to the sprint data for each individual: a second order polynomial and a modified Gaussian function ( $P(T) = e^{-\frac{(T-T_{opt})^2}{2\sigma^2}}$ ) that has been commonly used to fit performance curves for ectotherms (Deutsch et al. 2008), including *Anolis* sprint performance (Huey et al. 2009; Gunderson and Leal 2012). The Gaussian model provided relatively poor fits to the data, with residual standard errors much higher than the second-order polynomial model for all individuals (Fig. S2). Therefore, we use  $T_{opt}$  estimates from the second-order polynomial models for all analyses.  $T_{opt}$  estimates were constrained such that  $T_{opt}$  had to occur within the range of experimental temperatures. Thus, if the model predicted a  $T_{opt}$  greater than 35°C, we set that individual’s  $T_{opt}$  to 35°C. This is a conservative assumption that likely leads us to underestimate divergence in thermal physiology between species (see Results).

We were unable to use ANOVA for analyses of  $T_{opt}$  data because for four of our species, most individuals ran fastest at the highest test temperature, yielding heavily skewed distributions (see Results). Thus, we compared  $T_{opt}$  among species by assessing

overlap in 95% confidence intervals. We estimated confidence intervals based on 999 bootstrap replicates using the adjusted bootstrap percentile method due to the skew in our data (Efron 1987). Bootstrap resampling and 95% CI estimation were calculated in R using the “boot” and “boot.ci” functions, respectively, from the “boot” package.

## PERFORMANCE CONSEQUENCES OF PHYSIOLOGICAL DIVERGENCE

To evaluate the performance consequences of physiological divergence between Puerto Rican sister species pairs, we calculated the expected physiological performance of each species under natural warm and cool temperature regimes found on Puerto Rico. Two primary habitat types on Puerto Rico are shaded, cool mesic forest and more open, warm xeric forest (Ewel and Whitmore 1973). All four “warm niche” species in the species pairs occur in xeric forest, and all four “cool niche” species in the species pairs occur in mesic forest. In addition, two of the four “warm niche” species (*A. pulchellus* and *A. stratulus*) can occur in mesic forest where they favor open areas (Hertz 1979 and personal observation), and one “cool niche” species (*A. cristatellus*) can occur in xeric forest where it favors shaded areas (Gunderson and Leal 2012). From a previous study (Gunderson and Leal 2012), we have a data set of operative temperature distributions from mesic and xeric forest measured with copper lizard models (Hertz 1992a) during the summer, the peak of the breeding season for Puerto Rican anoles (Gorman and Licht 1974). The operative temperature distribution is a quantitative description of a thermal environment from the organism’s perspective (Hertz et al. 1993) and can be thought of as a distribution of potential body temperatures in each habitat. Mean operative temperature

in the mesic habitat is significantly cooler than that in the xeric habitat, by 4.5°C (Gunderson and Leal 2012).

We estimated the physiological performance in the mesic and xeric operative thermal environments using two metrics: 1) mean relative physiological performance capacity (Hertz et al. 1993; Huey et al. 2009; Gunderson and Leal 2012), and 2) threat of overheating, the percentage of operative temperature observations over  $CT_{max}$ . To estimate mean relative performance capacity, we generated a thermal performance curve for each species using our sprint performance and  $CT_{max}$  data sets. Thermal performance curves were a combination of two functions: one describing performance below  $T_{opt}$ , and the other describing performance from  $T_{opt}$  to  $CT_{max}$  (Deutsch et al. 2008; Huey et al. 2009; Gunderson and Leal 2012). The former function was a second-order polynomial fit to the sprint data of each species. The latter function took the form:

$$P(T) = 1.0 - \left( \frac{T - T_{opt}}{CT_{max} - T_{opt}} \right)^2 \quad (\text{Huey et al. 2009; Gunderson and Leal 2012}).$$

Fitted curves for each species can be seen in Fig. S3. The curves were scaled to represent relative performance by setting sprint speed at  $T_{opt}$  to 1.0. With these curves, we calculated the mean relative physiological performance capacity of each species in each habitat (Hertz et al. 1993; Huey et al. 2009; Gunderson and Leal 2012). Theory predicts that relative performance is expected to remain high as species adapt to different thermal environments (Angilletta et al. 2006; Martin and Huey 2008).

## RATES OF EVOLUTION

To compare rates of evolution of thermal niche traits to morphological traits involved in structural niche partitioning (*sensu* Hertz et al. 2013), we used a phylogenetic

comparative approach. Rate of evolution of heat tolerance ( $CT_{\max}$ ) was compared to rates for body size (snout-vent-length, or SVL), head length, femur length, and adhesive toepad width for the 4<sup>th</sup> hindtoe. We used the maximum clade credibility phylogeny of Mahler et al. (2010) for these analyses. Morphological data are also from Mahler et al. (2010) and are described in greater detail therein. Shape data (head length, femur length, and toepad width) were size-corrected using phylogenetic regression in phytools (Revell 2012) prior to analysis. We used the phylogenetic approach described by Adams (2013) to conduct pairwise rate comparisons for all combinations of these five traits. For each comparison, we used likelihood ratio tests to compare a model in which the two traits were free to evolve at different rates to a model in which the traits were constrained to evolve at a single rate. Rates were estimated using species means of natural log-transformed values for all traits (such that variation is represented in terms of proportional change) and permitting co-estimation of among-trait covariances (similar results were obtained with covariances fixed at zero).

## Results

### PHYSIOLOGICAL DIVERGENCE BETWEEN PUERTO RICAN SPECIES

#### PAIRS

Physiological divergence is apparent in at least one trait ( $T_{\text{opt}}$ ,  $CT_{\max}$ , or both) between all sister species pairs on Puerto Rico, and in all cases the pattern of divergence is in the direction predicted based on the species' thermal niches.

Significant differences in  $T_{\text{opt}}$  were observed for the *A. evermanni*/*A. stratulus* and *A. cristatellus*/*A. cooki* species pairs (*i.e.*, no overlap in 95% confidence intervals),

but not in the *A. poncensis*/*A. gundlachi* or *A. pulchellus*/*A. krugi* species pairs (Fig. 2A). However, it should be noted that our analysis almost certainly underestimates the  $T_{\text{opt}}$  of *A. cooki* and *A. stratulus*, which can be seen by looking at Fig. 2A; in both of these species, nearly all of the individuals had a  $T_{\text{opt}}$  of 35°C solely because that was our maximum test temperature.

$CT_{\text{max}}$  differed significantly among Puerto Rican species ( $F_{7,72} = 42.74$ ;  $P < 0.001$ ). Planned orthogonal contrasts demonstrated significant divergence in three of the four species pairs: *A. evermanni*/*A. stratulus*, *A. poncensis*/*A. gundlachi*, and *A. pulchellus*/*A. krugi* (all  $P < 0.001$ ), but not in the *A. cristatellus*/*A. cooki* species pair ( $P = 0.490$ ; Fig. 2B).

## PHYSIOLOGICAL PERFORMANCE IN DIFFERENT THERMAL REGIMES

For three of the four sister-species pairs, the cool niche species is predicted to have higher physiological performance capacity throughout the day within the shaded operative thermal environment, with the mean performance advantage being 8-14% depending on the species pair and time of day (Fig. 3). The lone exception occurs with the *A. pulchellus*/*A. krugi* sister species pair, for which performance estimates are similar for both species throughout the day (Fig. 3G). In the open habitat operative environment, the warm niche species tend to have a performance advantage, particularly during midday hours (from 10:00-13:00; Fig. 3). The exception in this case is the *A. cristatellus*/*A. cooki* species pair, for which *A. cristatellus* has higher predicted performance capacity early and late in the day, and both species have similar predicted performance during the midday hours (Fig. 3D). However, midday performance of *A. cooki* is likely

underestimated due to our probable underestimation of the  $T_{\text{opt}}$  of this species (see above).

None of the species are under threat of overheating in the shaded operative thermal environment (Fig. 4A, C, E, G). However, all species have a threat of overheating in the open habitat operative thermal environment (Fig. 4B, D, F, H). For three of the four sister-species pairs (*A. stratulus*/*A. evermanni*, *A. poncensis*/*A. gundlachi*, and *A. pulchellus*/*A. krugi*), the cool niche species has a higher probability of overheating throughout the day (Fig. 4B, F, H). The difference in probability of overheating is particularly acute during the midday hours, when the cool niche species in these sister-species pairs have probabilities of overheating that are at least twice that of warm niche species (all of which are significant differences; G-tests, all  $P < 0.05$ ). The only sister-species pair for which this relationship does not hold is *A. cristatellus*/*A. cooki*, for which there was no divergence in  $CT_{\text{max}}$  (Fig. 4D).

## PHYSIOLOGICAL EVOLUTION WITHIN THE JAMAICAN RADIATION

Significant differences in thermal physiology were also present among Jamaican species. Mean  $T_{\text{opt}}$  ranges from approximately 29.5 to 34.6°C (Fig. 5A; true  $T_{\text{opt}}$ s of *A. grahami* and *A. opalinus* likely underestimated due to our experimental upper measurement limit of 35°C, see above), while  $CT_{\text{max}}$  ranges from 35.8-41.5°C among species (Fig. 5B; ANOVA,  $F_{3,36} = 13.6$ ,  $P < 0.001$ ).

## PHYSIOLOGICAL DIFFERENCES BETWEEN SYMPATRIC SPECIES

Across Puerto Rico and Jamaica, sympatric species that occupy the same structural niche (*i.e.*, are morphologically similar) invariably differ in thermal physiology (Table 1). Three of these sympatric pairs are sister species from Puerto Rico described above (*i.e.*, the trunk-crown ecomorph species *A. stratulus*/*A. evermanni*; the trunk-ground species *A. cristatellus*/*A. cooki*; the grass-bush species *A. krugi*/*A. pulchellus*). The trunk-ground species *A. cristatellus* and *A. gundlachi* also co-occur in some areas of Puerto Rico and differ in  $CT_{max}$  ( $P < 0.001$ ). On Jamaica, the trunk-ground anole *A. lineatopus* and trunk-crown anole *A. grahami* differ in  $CT_{max}$ , as do *A. lineatopus* and the introduced trunk-ground anole *A. sagrei* (both  $P < 0.001$ ; Table 1).

## RATES OF PHYSIOLOGICAL AND MORPHOLOGICAL EVOLUTION

Thermal tolerance has evolved more slowly than some, but not all, morphological traits associated with ecomorphological divergence (Table 2).  $CT_{max}$  evolved significantly more slowly than body size (SVL;  $P < 0.001$ ) and relative limb length (femur;  $P = 0.029$ ). No differences in evolutionary rates were found between  $CT_{max}$  and either head length ( $P = 0.105$ ) or toepad width ( $P = 0.112$ ).

## Discussion

Evolution of the climatic niche has emerged as an important component of many evolutionary radiations, but the functional consequences of climate niche divergence are generally unknown. We demonstrate here that climatic niche divergence among species in the *Anolis* adaptive radiation is accompanied by physiological divergence in both temperature tolerance and sensitivity to sub-lethal temperature variability. Species that



occupy warmer niches have either higher heat tolerance, higher optimal temperatures for physiological performance, or both, compared to species that occupy cooler thermal niches. Such physiological diversification has occurred repeatedly, as is most easily seen among four sister-species pairs present on Puerto Rico that differ in thermal niche (Fig. 2). Divergence in thermal physiology is also present on Jamaica, with species spanning essentially the full range of heat tolerances and optimal temperatures found on Puerto Rico (Fig. 5).

The repeated divergence of thermal physiology among species occupying distinct thermal niches is itself evidence of adaptation (Harvey and Pagel 1991). However, we also provide more direct evidence of the adaptive significance of physiological divergence by estimating physiological performance parameters for Puerto Rican species based on detailed measurements of warm and cool thermal environments found on the island. In shaded habitat, cool niche species have higher predicted mean performance capacities than their warm niche sister species in three of the four species pairs (Fig. 3). The only exception is the *A. krugi/A. pulchellus* species pair, for which there was no divergence in optimal temperature. Within the warmer open habitat the pattern was less pronounced, with warm niche species appearing to have a sizable performance advantage in only two of the species pairs (Fig. 3). The advantage of physiological divergence for warm-niche species becomes much more apparent when considering overheating risk. During midday hours in the warmer open habitat, warm niche species in three of the four species pairs had less than half the overheating risk of cool-niche species (Fig. 4). The lone exception was the *A. cristatellus/A. cooki* species pair, which had no divergence in

thermal tolerance (Fig. 2B). No species was at risk of overheating in the cooler, shaded habitat (Fig. 4).

Our analysis of physiological performance in different thermal environments assumes that animals are randomly utilizing perch sites with respect to available operative temperatures. Anoles are known to behaviorally thermoregulate (Hertz et al. 1993), in effect modulating the thermal environment that they experience by avoiding perch sites with operative temperatures that are physiologically detrimental (Huey et al. 2003). However, behavioral thermoregulation is costly, and animals living within environments in which they do not need to make behavioral adjustments should be at a substantial advantage (Huey 1974; Huey and Slatkin 1976; Sears et al. 2011; Sears and Angilletta 2015). Thus, cool niche lizards in more open areas are likely to have reduced space and time available for normal activity compared to the more heat-tolerant warm niche species, and the same will hold true for warm-niche lizards in cooler areas (Gunderson and Leal 2015, 2016).

The high community-level species diversity associated with many adaptive radiations, including *Anolis*, is at least partially enabled by fine-scale resource partitioning among constituent taxa (Schluter 2000). Sympatric anoles are known to partition thermal microhabitats (Ruibal 1961; Rand 1964), and our analysis indicates that this is facilitated by physiological divergence. When anole species that share the same structural niche (*i.e.*, share the same or similar ecomorphology) co-occur, they invariably differ in temperature-dependent physiological traits (Table 1). This pattern is not only maintained for ecologically similar species that are endemic members of the community, but also for introduced species: in Jamaica, the endemic trunk-ground species *A.*

*lineatopus* is found in sympatry with the introduced trunk-ground species *A. sagrei*, and these species differ significantly in thermal tolerance (Table 1).

We found that physiological thermal tolerance has evolved more slowly than some morphological traits (SVL and femur length), and has evolved at similar rates to other morphological traits (head length and toe-pad width; Table 2). This result is at odds with a recent analysis which found that divergence in thermal physiology, estimated as field body temperature, occurs more quickly than morphological divergence in anoles (Hertz et al. 2013). However, we note that in that study, estimated rates for thermal and morphological traits are not directly comparable because they were not standardized to the same scale before analysis (Adams 2013). Our results demonstrate that high rates of evolutionary change are not necessary for traits to be ecologically important, as the relatively slow divergence that we have observed in anole thermal tolerance has important performance consequences with respect to overheating risk in warm habitats (Fig. 4).

A critical question when assessing patterns of evolution is determining the potential for observed divergence to be driven by phenotypic plasticity as opposed to heritable genetic change. With respect to thermal physiology, direct evidence from anoles and broader patterns from reptiles indicate that the magnitude of divergence that we have observed is unlikely to be the result of acclimation to different thermal regimes. For example, metabolic rates of the Puerto Rican *A. cristatellus* and *A. gundlachi*, as well as *A. sagrei* introduced to Florida, do not change in response to acclimation temperature (Rogowitz 1996b, a). Tests for acclimation in thermal tolerance in Greater Antillean anoles have also suggested no (Leal and Gunderson 2012; Muñoz et al. 2014) or limited

(Kolbe et al. 2012) plasticity in this physiological trait. These results are consistent with two recent meta-analyses of plasticity in thermal physiology, both of which demonstrated that reptiles have among the lowest acclimation capacities of all ectotherms (Gunderson and Stillman 2015; Seebacher et al. 2015). For example, among reptiles  $CT_{max}$  changes an average of only 0.1°C for every 10°C change in mean body temperature (Gunderson and Stillman 2015).

We have provided comprehensive evidence for the importance of physiological divergence in the Puerto Rican and Jamaican *Anolis* adaptive radiations. However, the importance of physiological divergence is likely not restricted to these islands. For example, divergence in thermal tolerances have been demonstrated for trunk-ground anoles of the *cybotes* group that occur along an elevational gradient in Hispaniola (Hertz and Huey 1981; Muñoz et al. 2014), and variation in thermal physiology has also been demonstrated among some mainland anoles (van Berkum 1986; Logan et al. 2013). Physiological divergence is also not restricted to thermal traits, as there is significant divergence in water loss rates among species and populations of anoles, which is often correlated with thermal niche (Sexton and Heatwole 1968; Hillman and Gorman 1977; Hertz et al. 1979; Hillman et al. 1979; Hertz 1980; Dmi'el et al. 1997; Gunderson et al. 2011). Though more work is required, the general pattern emerging is that physiological divergence along the climatic niche axis may be as important as morphological divergence along the structure niche axis in this classic radiation.

Our results highlight the benefits of a functional approach to investigating climatic niche evolution. By focusing on physiological traits that link organismal performance to abiotic conditions, we were able to demonstrate how phenotypes evolve

in response to climatic environments and estimate the performance consequences of observed divergence in natural habitats. In addition, our functional perspective allowed us to determine the contribution of climatic niche divergence to microhabitat partitioning and species co-existence. We suggest that the current trend to use ENMs, which contain no information about organismal phenotypes or fine-scale habitat use, should only be a first step in a more comprehensive research program to determine how and why climatic niche divergence contributes to evolutionary radiations.

### *Acknowledgements*

David Steinberg provided help in the field. Logistical support in Puerto Rico was provided by the El Verde Biological Station and Mata de Plátano Field Station. We also thank the owners of Ridge to Reef farm in St. Croix and Green Castle Estates in Jamaica for allowing us to stay and work on their properties. Permits were provided by The Departamento de Recursos Naturales y Ambientales of Puerto Rico, the St. Croix Division of Fish and Wildlife, and the Jamaican National Environment and Planning Agency. Funding was provided by a NSF Doctoral Dissertation Improvement Grant (1110570) to A.R.G.

## 481 *References*

- 482 Adams, D. C. 2013. Quantifying and comparing phylogenetic evolutionary rates for  
483 shape and other high-dimensional phenotypic data. *Systematic Biology*  
484 62:181-192.
- 485 Algar, A. C. and D. L. Mahler. 2015. Area, climate heterogeneity, and the response of  
486 climate niches to ecological opportunity in island radiations of *Anolis* lizards.  
487 *Global Ecology and Biogeography* doi:10.1111 /geb.12327.
- 488 Alvarado - Serrano, D. F. and L. L. Knowles. 2014. Ecological niche models in  
489 phylogeographic studies: applications, advances and precautions. *Molecular*  
490 *Ecology Resources* 14:233-248.
- 491 Angilletta, M. J. 2009. Thermal adaptation: a theoretical and empirical synthesis.  
492 Oxford University Press.
- 493 Angilletta, M. J., A. F. Bennett, H. Guderley, C. A. Navas, F. Seebacher, and R. S. Wilson.  
494 2006. Coadaptation: A Unifying Principle in Evolutionary Thermal Biology.  
495 *Physiological and Biochemical Zoology* 79:282-294.
- 496 Araújo, M. B. and A. T. Peterson. 2012. Uses and misuses of bioclimatic envelope  
497 modeling. *Ecology* 93:1527-1539.
- 498 Arnegard, M. E., P. B. McIntyre, L. J. Harmon, M. L. Zelditch, W. G. Crampton, J. K.  
499 Davis, J. P. Sullivan, S. Lavoué, and C. D. Hopkins. 2010. Sexual signal  
500 evolution outpaces ecological divergence during electric fish species  
501 radiation. *The American Naturalist* 176:335-356.
- 502 Bogert, C. M. 1949. Thermoregulation in reptiles, a factor in evolution. *Evolution*  
503 3:195-211.
- 504 Bonino, M. F., D. L. M. Azócar, M. J. Tulli, C. S. Abdala, M. G. Perotti, and F. B. Cruz.  
505 2011. Running in cold weather: morphology, thermal biology, and  
506 performance in the southernmost lizard clade in the world (*Liolaemus*  
507 *lineomaculatus* section: Liolaemini: Iguania). *Journal of Experimental Zoology*  
508 Part A: Ecological Genetics and Physiology 315:495-503.
- 509 Buckley, L. B., M. C. Urban, M. J. Angilletta, L. G. Crozier, L. J. Rissler, and M. W. Sears.  
510 2010. Can mechanism inform species' distribution models? *Ecology Letters*  
511 13:1041-1054.
- 512 Deutsch, C. A., J. J. Tewksbury, R. B. Huey, K. S. Sheldon, C. K. Ghalambor, D. C. Haak,  
513 and P. R. Martin. 2008. Impacts of climate warming on terrestrial ectotherms  
514 across latitude. *Proceedings of the National Academy of Sciences* 105:6668-  
515 6672.
- 516 Dmi'el, R., G. Perry, and J. Lazell. 1997. Evaporative water loss in nine insular  
517 populations of the lizard *Anolis cristatellus* group in the British Virgin Islands.  
518 *Biotropica* 29:111-116.
- 519 Efron, B. 1987. Better bootstrap confidence intervals. *Journal of the American*  
520 *Statistical Association* 82:171-185.
- 521 Ewel, J. J. and J. L. Whitmore. 1973. Ecological life zones of Puerto Rico and US Virgin  
522 Islands. Forest Service Research Paper ITF-18. U.S. Department of  
523 Agriculture.

524 Fleishman, L. J., M. Leal, and M. H. Persons. 2009. Habitat light and dewlap color  
525 diversity in four species of Puerto Rican anoline lizards. *Journal of*  
526 *Comparative Physiology A* 195:1043-1060.

527 Gamble, T., A. J. Geneva, R. E. Glor, and D. Zarkower. 2014. *Anolis* sex chromosomes  
528 are derived from a single ancestral pair. *Evolution* 68:1027-1041.

529 Gorman, G. C. and P. Licht. 1974. Seasonality in ovarian cycles among tropical *Anolis*  
530 lizards. *Ecology* 55:360-369.

531 Grant, P. R. 1999. *Ecology and evolution of Darwin's finches*. Princeton University  
532 Press.

533 Guisan, A. and W. Thuiller. 2005. Predicting species distribution: offering more than  
534 simple habitat models. *Ecology Letters* 8:993-1009.

535 Gunderson, A. R. and M. Leal. 2012. Geographic variation in vulnerability to climate  
536 warming in a tropical Caribbean lizard. *Functional Ecology* 26:783-793.

537 Gunderson, A. R. and M. Leal. 2015. Patterns of thermal constraint on ectotherm  
538 activity. *The American Naturalist* 185:653-664.

539 Gunderson, A. R. and M. Leal. 2016. A conceptual framework for understanding  
540 thermal constraints on ectotherm activity with implications for predicting  
541 responses to global change. *Ecology Letters* 19:111-120.

542 Gunderson, A. R., J. Siegel, and M. Leal. 2011. Tests of the contribution of acclimation  
543 to geographic variation in water loss rates of the West Indian lizard *Anolis*  
544 *cristatellus*. *Journal of Comparative Physiology B* 181:965-972.

545 Gunderson, A. R. and J. H. Stillman. 2015. Plasticity in thermal tolerance has limited  
546 potential to buffer ectotherms from global warming. *Proceedings of the Royal*  
547 *Society of London B: Biological Sciences* 282:20150401.

548 Harvey, P. H. and M. D. Pagel. 1991. *The comparative method in evolutionary*  
549 *biology*. Oxford University Press.

550 Heatwole, H., T.-H. Lin, E. Villalón, A. Muñiz, and A. Matta. 1969. Some aspects of the  
551 thermal ecology of Puerto Rican anoline lizards. *Journal of Herpetology* 3:65-  
552 77.

553 Hertz, P., A. Arce-Hernandez, J. Ramirez-Vazquez, W. Tirado-Rivera, and L. Vazquez-  
554 Vives. 1979. Geographical variation of heat sensitivity and water loss rates in  
555 the tropical lizard, *Anolis gundlachi*. *Comparative Biochemistry and*  
556 *Physiology Part A: Physiology* 62:947-953.

557 Hertz, P. E. 1979. Sensitivity to high temperatures in three west Indian grass anoles  
558 (sauria, iguanidae), with a review of heat sensitivity in the genus *Anolis*.  
559 *Comparative Biochemistry and Physiology Part A: Physiology*  
560 63:217-222.

561 Hertz, P. E. 1980. Responses to dehydration in *Anolis* lizards sampled along  
562 altitudinal transects. *Copeia* 1980:440-446.

563 Hertz, P. E. 1992a. Evaluating thermal resource partitioning by sympatric lizards  
564 *Anolis cooki* and *A. cristatellus*: a field test using null hypotheses. *Oecologia*  
565 90:127-136.

566 Hertz, P. E. 1992b. Temperature regulation in Puerto Rican *Anolis* lizards: a field test  
567 using null hypotheses. *Ecology* 73:1405-1417.



568 Hertz, P. E., Y. Arima, A. Harrison, R. B. Huey, J. B. Losos, and R. E. Glor. 2013.  
569 Asynchronous evolution of physiology and morphology in *Anolis* lizards.  
570 Evolution 67:2101-2113.

571 Hertz, P. E. and R. B. Huey. 1981. Compensation for altitudinal changes in the  
572 thermal environment by some *Anolis* lizards on Hispaniola. Ecology 62:515-  
573 521.

574 Hertz, P. E., R. B. Huey, and R. Stevenson. 1993. Evaluating temperature regulation  
575 by field-active ectotherms: the fallacy of the inappropriate question. The  
576 American Naturalist 142:796-818.

577 Hillman, S. and G. Gorman. 1977. Water loss, desiccation tolerance, and survival  
578 under desiccating conditions in 11 species of Caribbean *Anolis*. Oecologia  
579 29:105-116.

580 Hillman, S., G. C. Gorman, and R. Thomas. 1979. Water loss in *Anolis* lizards: evidence  
581 for acclimation and intraspecific differences along a habitat gradient.  
582 Comparative Biochemistry and Physiology Part A: Physiology 62:491-493.

583 Hochachka, P. W. and G. N. Somero. 2002. Biochemical Adaptation: Mechanism and  
584 process in physiological evolution. Oxford University Press.

585 Huey, R. B. 1974. Behavioral thermoregulation in lizards: importance of associated  
586 costs. Science 184:101-103.

587 Huey, R. B. 1983. Natural variation in body temperature and physiological  
588 performance in a lizard (*Anolis cristatellus*). Pp. 484-490. Advances in  
589 herpetology and evolutionary biology: essays in honor of Ernest E. Williams.

590 Huey, R. B., C. A. Deutsch, J. J. Tewksbury, L. J. Vitt, P. E. Hertz, H. J. Á. Pérez, and T.  
591 Garland. 2009. Why tropical forest lizards are vulnerable to climate warming.  
592 Proceedings of the Royal Society B: Biological Sciences 276:1939-1948.

593 Huey, R. B., P. E. Hertz, and B. Sinervo. 2003. Behavioral drive versus behavioral  
594 inertia in evolution: a null model approach. The American Naturalist  
595 161:357-366.

596 Huey, R. B. and M. Slatkin. 1976. Cost and benefits of lizard thermoregulation.  
597 Quarterly Review of Biology 51:363-384.

598 Huey, R. B. and T. P. Webster. 1976. Thermal biology of *Anolis* lizards in a complex  
599 fauna: the *cristatellus* group on Puerto Rico. Ecology 57:985-994.

600 Jackman, T. R., A. Larson, K. De Queiroz, and J. B. Losos. 1999. Phylogenetic  
601 relationships and tempo of early diversification in *Anolis* lizards. Systematic  
602 Biology 48:254-285.

603 Kaspari, M., N. A. Clay, J. Lucas, S. P. Yanoviak, and A. Kay. 2015. Thermal adaptation  
604 generates a diversity of thermal limits in a rainforest ant community. Global  
605 Change Biology 21:1092-1102.

606 Kearney, M. and W. Porter. 2009. Mechanistic niche modelling: combining  
607 physiological and spatial data to predict species' ranges. Ecology letters  
608 12:334-350.

609 Keller, I. and O. Seehausen. 2012. Thermal adaptation and ecological speciation.  
610 Molecular Ecology 21:782-799.

611 Kellermann, V., B. van Heerwaarden, C. M. Sgrò, and A. A. Hoffmann. 2009.  
612 Fundamental evolutionary limits in ecological traits drive *Drosophila* species  
613 distributions. Science 325:1244-1246.



Knouft, J. H., J. B. Losos, R. E. Glor, and J. J. Kolbe. 2006. Phylogenetic analysis of the evolution of the niche in lizards of the *Anolis sagrei* group. *Ecology* 87:S29-S38.

Kolbe, J. J., P. S. VanMiddlesworth, N. Losin, N. Dappen, and J. B. Losos. 2012. Climatic niche shift predicts thermal trait response in one but not both introductions of the Puerto Rican lizard *Anolis cristatellus* to Miami, Florida, USA. *Ecology and Evolution* 2:1503-1516.

Kozak, K. H. and J. J. Wiens. 2007. Climatic zonation drives latitudinal variation in speciation mechanisms. *Proceedings of the Royal Society of London B: Biological Sciences* 274:2995-3003.

Labra, A., J. Pienaar, and T. F. Hansen. 2009. Evolution of thermal physiology in *Liolaemus* lizards: adaptation, phylogenetic inertia, and niche tracking. *The American Naturalist* 174:204-220.

Lawing, A. M., P. D. Polly, D. K. Hews, E. P. Martins, D. C. Collar, and J. L. Bronstein. 2016. Including Fossils in Phylogenetic Climate Reconstructions: A Deep Time Perspective on the Climatic Niche Evolution and Diversification of Spiny Lizards (*Sceloporus*). *The American Naturalist* 188:000-000.

Leal, M. and A. R. Gunderson. 2012. Rapid change in the thermal tolerance of a tropical lizard. *The American Naturalist* 180:815-822.

Levin, L. A., R. J. Etter, M. A. Rex, A. J. Gooday, C. R. Smith, J. Pineda, C. T. Stuart, R. R. Hessler, and D. Pawson. 2001. Environmental influences on regional deep-sea species diversity. *Annual Review of Ecology and Systematics* 32:51-93.

Logan, M. L., R. M. Cox, and R. Calsbeek. 2014. Natural selection on thermal performance in a novel thermal environment. *Proceedings of the National Academy of Sciences* 111:14165-14169.

Logan, M. L., R. K. Huynh, R. A. Precious, and R. G. Calsbeek. 2013. The impact of climate change measured at relevant spatial scales: new hope for tropical lizards. *Global Change Biology* 19:3093-3102.

Losos, J. B. 1990. Ecomorphology, performance capability, and scaling of West Indian *Anolis* lizards: an evolutionary analysis. *Ecological Monographs* 60:369-388.

Losos, J. B. 2009. *Lizards in an evolutionary tree: ecology and adaptive radiation of anoles*. University of California Press.

Losos, J. B., T. R. Jackman, A. Larson, K. de Queiroz, and L. Rodríguez-Schettino. 1998. Contingency and determinism in replicated adaptive radiations of island lizards. *Science* 279:2115-2118.

Losos, J. B., M. Leal, R. E. Glor, K. de Queiroz, P. E. Hertz, L. R. Schettino, A. C. Lara, T. R. Jackman, and A. Larson. 2003. Niche lability in the evolution of a Caribbean lizard community. *Nature* 424:542-545.

Mahler, D. L., T. Ingram, L. J. Revell, and J. B. Losos. 2013. Exceptional convergence on the macroevolutionary landscape in island lizard radiations. *Science* 341:292-295.

Mahler, D. L., L. J. Revell, R. E. Glor, and J. B. Losos. 2010. Ecological opportunity and the rate of morphological evolution in the diversification of Greater Antillean anoles. *Evolution* 64:2731-2745.

659 Martin, T. L. and R. B. Huey. 2008. Why “suboptimal” is optimal: Jensen’s inequality  
660 and ectotherm thermal preferences. *The American Naturalist* 171:E102-  
661 E118.

662 Matute, D. R., C. J. Novak, and J. A. Coyne. 2009. Temperature - based extrinsic  
663 reproductive isolation in two species of *Drosophila*. *Evolution* 63:595-612.

664 Meyer, A. 1993. Phylogenetic relationships and evolutionary processes in East  
665 African cichlid fishes. *Trends in Ecology & Evolution* 8:279-284.

666 Muñoz, M. M., M. A. Stimola, A. C. Algar, A. Conover, A. J. Rodriguez, M. A. Landestoy,  
667 G. S. Bakken, and J. B. Losos. 2014. Evolutionary stasis and lability in thermal  
668 physiology in a group of tropical lizards. *Proceedings of the Royal Society B:*  
669 *Biological Sciences* 281:20132433.

670 Nicholson, K. E., R. E. Glor, J. J. Kolbe, A. Larson, S. Blair Hedges, and J. B. Losos. 2005.  
671 Mainland colonization by island lizards. *Journal of Biogeography* 32:929-938.

672 Peterson, A. T., J. Soberón, R. G. Pearson, R. P. Anderson, M. Nakamura, E. Martinez-  
673 Meyer, and M. B. Araújo. 2011. Ecological niches and geographic  
674 distributions. Princeton University Press, Princeton, New Jersey, USA.

675 Pincheira-Donoso, D. 2011. Predictable variation of range-sizes across an extreme  
676 environmental gradient in a lizard adaptive radiation: evolutionary and  
677 ecological inferences. *PloS One* 6:e28942.

678 Potter, K. A., H. A. Woods, and S. Pincebourde. 2013. Microclimatic challenges in  
679 global change biology. *Global change biology* 19:2932–2939.

680 Quintero, I. and J. J. Wiens. 2013. Rates of projected climate change dramatically  
681 exceed past rates of climatic niche evolution among vertebrate species.  
682 *Ecology Letters* 16:1095-1103.

683 Rand, A. S. 1964. Ecological distribution in anoline lizards of Puerto Rico. *Ecology*  
684 45:745-752.

685 Revell, L. J. 2012. phytools: an R package for phylogenetic comparative biology (and  
686 other things). *Methods in Ecology and Evolution* 3:217-223.

687 Rogowitz, G. L. 1996a. Evaluation of thermal acclimation and altitudinal variation of  
688 metabolism in a Neotropical lizard, *Anolis gundlachi*. *Copeia* 1996:535-542.

689 Rogowitz, G. L. 1996b. Evaluation of thermal acclimation of metabolism in two  
690 eurythermal lizards, *Anolis cristatellus* and *A. sagrei*. *Journal of Thermal*  
691 *Biology* 21:11-14.

692 Ruibal, R. 1961. Thermal relations of five species of tropical lizards. *Evolution* 15:98-  
693 111.

694 Schluter, D. 2000. The ecology of adaptive radiation. Oxford University Press.

695 Sears, M. W. and M. J. Angilletta. 2015. Costs and benefits of thermoregulation  
696 revisited: both the heterogeneity and spatial structure of temperature drive  
697 energetic costs. *The American Naturalist* 185:E94-E102.

698 Sears, M. W., E. Raskin, and M. J. Angilletta. 2011. The world is not flat: defining  
699 relevant thermal landscapes in the context of climate change. *Integrative and*  
700 *Comparative Biology* 51:666-675.

701 Seebacher, F., C. R. White, and C. E. Franklin. 2015. Physiological plasticity increases  
702 resilience of ectothermic animals to climate change. *Nature Climate Change*  
703 5:61-66.

- Seehausen, O., Y. Terai, I. S. Magalhaes, K. L. Carleton, H. D. Mrosso, R. Miyagi, I. van der Sluijs, M. V. Schneider, M. E. Maan, and H. Tachida. 2008. Speciation through sensory drive in cichlid fish. *Nature* 455:620-626.
- Sexton, O. J. and H. Heatwole. 1968. An experimental investigation of habitat selection and water loss in some anoline lizards. *Ecology* 49:762-767.
- Simpson, G. G. 1953. Major features of evolution. Columbia University Press, New York.
- Stillman, J. H. and G. N. Somero. 2000. A comparative analysis of the upper thermal tolerance limits of eastern Pacific porcelain crabs, genus *Petrolisthes*: influences of latitude, vertical zonation, acclimation, and phylogeny. *Physiological and Biochemical Zoology* 73:200-208.
- Sunday, J. M., A. E. Bates, and N. K. Dulvy. 2011. Global analysis of thermal tolerance and latitude in ectotherms. *Proceedings of the Royal Society B: Biological Sciences* 278:1823-1830.
- van Berkum, F. H. 1986. Evolutionary patterns of the thermal sensitivity of sprint speed in *Anolis* lizards. *Evolution* 40:594-604.
- Wake, D. B. 1987. Adaptive radiation of salamanders in Middle American cloud forests. *Annals of the Missouri Botanical Garden* 74:242-264.
- Warren, D. L., M. Cardillo, D. F. Rosauer, and D. I. Bolnick. 2014. Mistaking geography for biology: inferring processes from species distributions. *Trends in Ecology & Evolution* 29:572-580.
- Warren, D. L., R. E. Glor, and M. Turelli. 2008. Environmental niche equivalency versus conservatism: quantitative approaches to niche evolution. *Evolution* 62:2868-2883.
- Williams, E. E. 1972. The origin of faunas. Evolution of lizard congeners in a complex island fauna: a trial analysis. *Evolutionary Biology* 6:47-89.
- Williams, E. E. 1983. Ecomorphs, faunas, island size, and diverse end points in island radiations of *Anolis*. Pp. 326-370. *Lizard ecology: studies of a model organism*. Harvard University Press, Cambridge.

742

743

744

745

746

747

748

749 Table 1. Physiology differences between co-occurring species that occupy the same or  
750 similar structural niches (*i.e.*, share the same or similar ecomorphology). For  $CT_{\max}$ , P-  
751 values are given based on one-way ANOVA with planned orthogonal contrasts. For  $T_{\text{opt}}$ ,  
752 “\*” indicates that the bootstrapped 95% confidence intervals did not overlap, “N.S.”  
753 indicates no significant difference. “†” indicates that the species is an introduced member  
754 of the community.

755

756 Table 2. Estimated rates of evolution for heat tolerance ( $CT_{\max}$ ) and morphological traits  
757 related to ecomorphological divergence. Rate estimates (bold) are in the diagonal of the  
758 matrix. Upper off-diagonals contain estimates of pairwise evolutionary covariances  
759 among traits, lower off-diagonals contain P-values for likelihood ratio test comparisons  
760 of 2-rate versus 1-rate models for each trait pair. P-values less than 0.05 indicate support  
761 for a 2-rate model over a 1-rate model.

762

Table 1

| Co-occurring species   |                               | Ecomorph                 | Physiological divergence |           |
|------------------------|-------------------------------|--------------------------|--------------------------|-----------|
|                        |                               |                          | $CT_{max}$               | $T_{opt}$ |
| <i>A. stratulus</i>    | <i>A. evermani</i>            | Trunk-crown              | <0.001                   | *         |
| <i>A. cristatellus</i> | <i>A. cooki</i>               | Trunk-ground             | 0.490                    | *         |
| <i>A. cristatellus</i> | <i>A. gundlachi</i>           | Trunk-ground             | <0.001                   | N.S.      |
| <i>A. krugi</i>        | <i>A. pulchellus</i>          | Grass-bush               | <0.001                   | N.S.      |
| <i>A. lineatopsis</i>  | <i>A. grahami</i>             | Trunk-ground/Trunk-crown | <0.001                   | N.S.      |
| <i>A. lineatopsis</i>  | <i>A. sagrei</i> <sup>†</sup> | Trunk-ground             | <0.001                   | N.S.      |

Table 2.

|              | <b><math>CT_{\max}</math></b> | <b>SVL</b>      | <b>Head length</b> | <b>Femur length</b> | <b>Toepad width</b> |
|--------------|-------------------------------|-----------------|--------------------|---------------------|---------------------|
| CTmax        | <b>5.80E-05</b>               | -4.90E-05       | -1.60E-05          | -5.50E-05           | -9.90E-06           |
| SVL          | <0.001                        | <b>2.30E-03</b> | 8.90E-06           | -1.80E-05           | 2.70E-05            |
| Head length  | 0.105                         | <0.001          | <b>2.70E-05</b>    | 1.30E-05            | -6.30E-06           |
| Femur length | 0.029                         | <0.001          | 0.001              | <b>1.40E-04</b>     | 2.20E-05            |
| Toepad width | 0.112                         | <0.001          | 0.003              | 0.832               | <b>1.30E-04</b>     |

Figure 1: Phylogenetic relationships of the species included in this study, along with the islands from which they were sampled.

Figure 2: Thermal physiology of four sister-species pairs of Puerto Rican anole. Each species pair is represented in alternating grey and white regions of the plot with warm niche species in red and cool niche species in blue. (A) Optimal sprint performance temperatures ( $T_{opt}$ ). (B) Heat tolerance limits ( $CT_{max}$ ). “\*”, significant difference between members of a species pair; N.S., no significant difference between members of a species pair. See Methods for analysis details.

Figure 3: Predicted relative physiological performance of sister-species pairs of Puerto Rican *Anolis* under shaded and open habitat operative thermal environments found on Puerto Rico during morning, midday, and afternoon/evening hours. Warm niche species in red, cool niche species in blue. (A, B) *A. stratulus*/*A. evermanni*, (C, D) *A. cooki*/*A. cristatellus*, (E, F) *A. poncensis*/*A. gundlachi* (G, H) *A. pulchellus*/*A. krugi*.

Figure 4: Predicted overheating probability of sister-species pairs of Puerto Rican *Anolis* under shaded and open habitat operative thermal environments found on Puerto Rico during morning, midday, and afternoon/evening hours. Warm niche species in red, cool niche species in blue. (A, B) *A. stratulus*/*A. evermanni*, (C, D) *A. cooki*/*A. cristatellus* (E, F), *A. poncensis*/*A. gundlachi*, (G, H) *A. pulchellus*/*A. krugi*.

Figure 5: Thermal physiology of endemic Jamaican anoles. (A) Optimal sprinting temperature ( $T_{\text{opt}}$ ). *Anolis valencienni* does not have a  $T_{\text{opt}}$  estimate because this species could not be induced to run. (B) Heat tolerance ( $CT_{\text{max}}$ ).



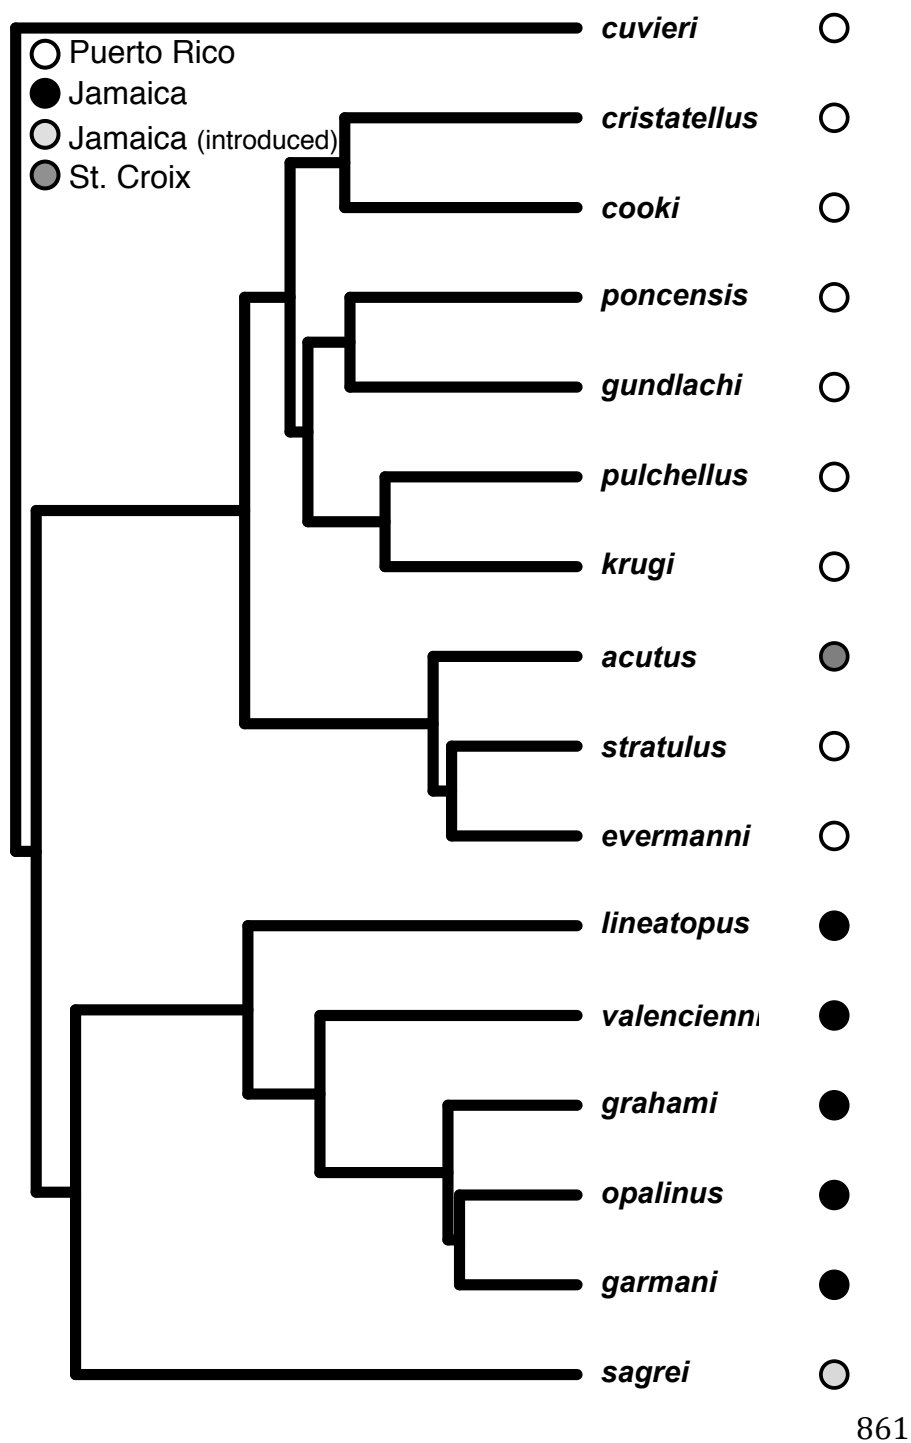

Figure 1.

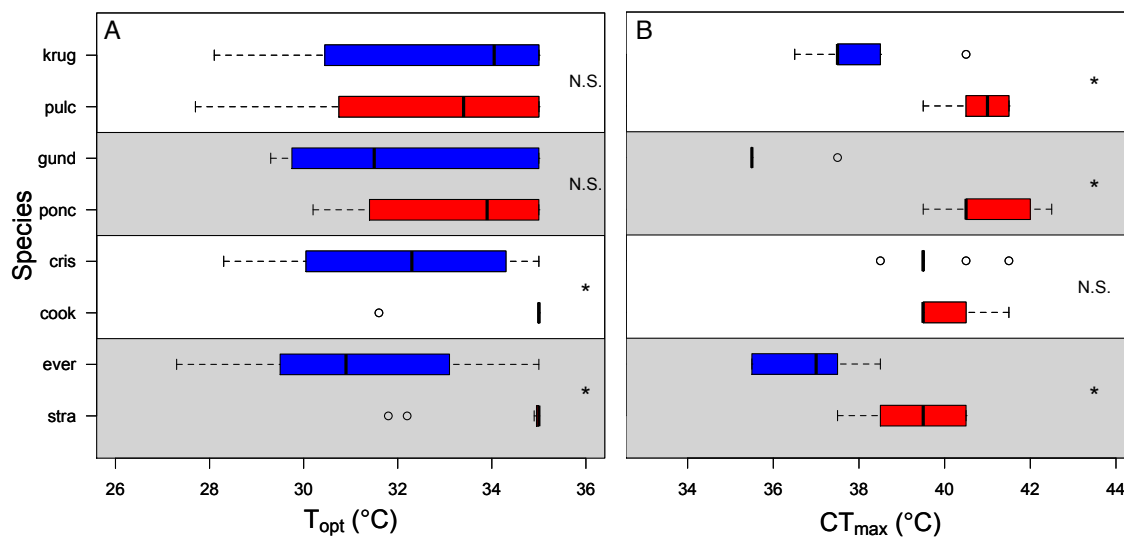

Figure 2.

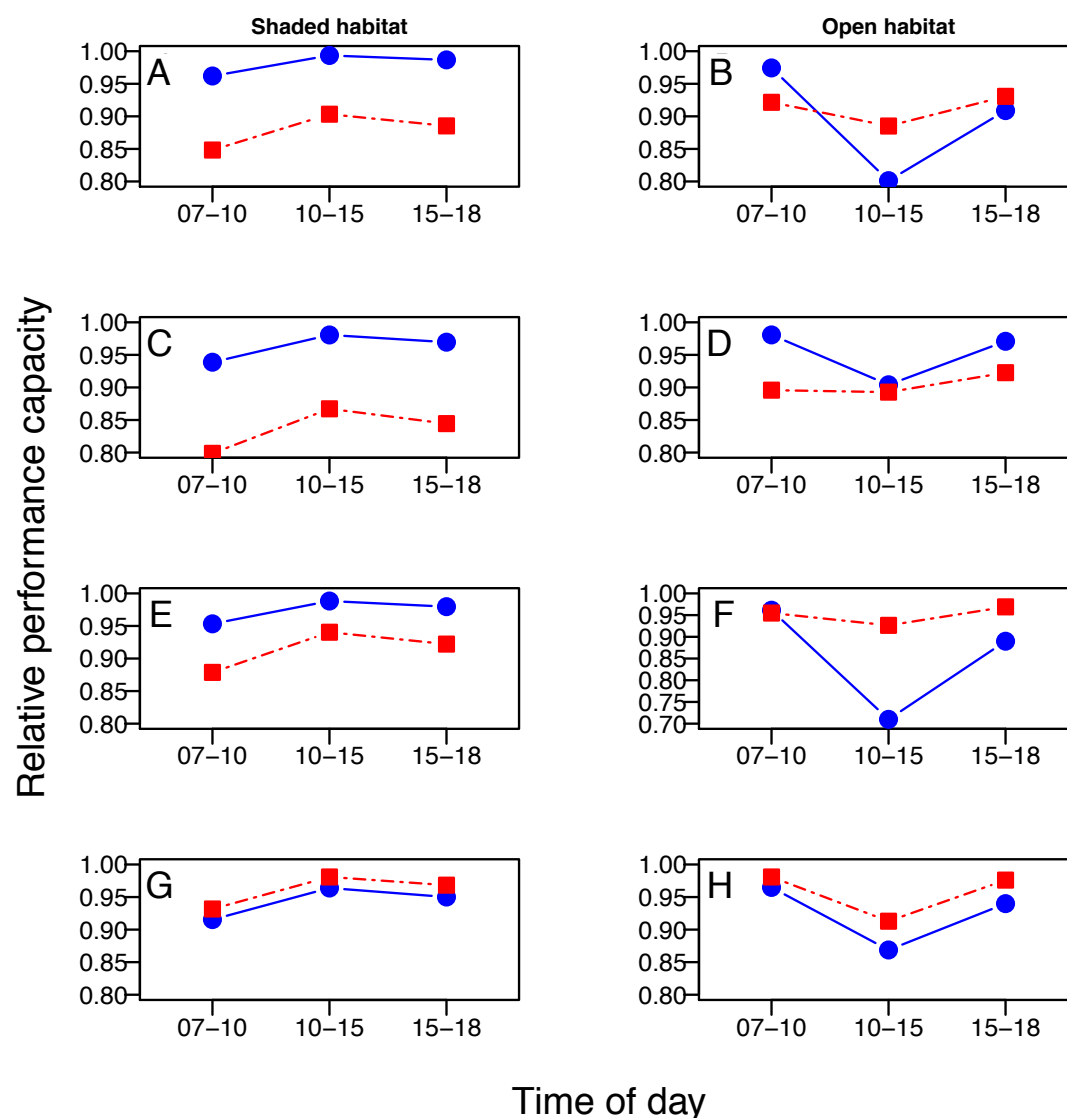

Figure 3

882

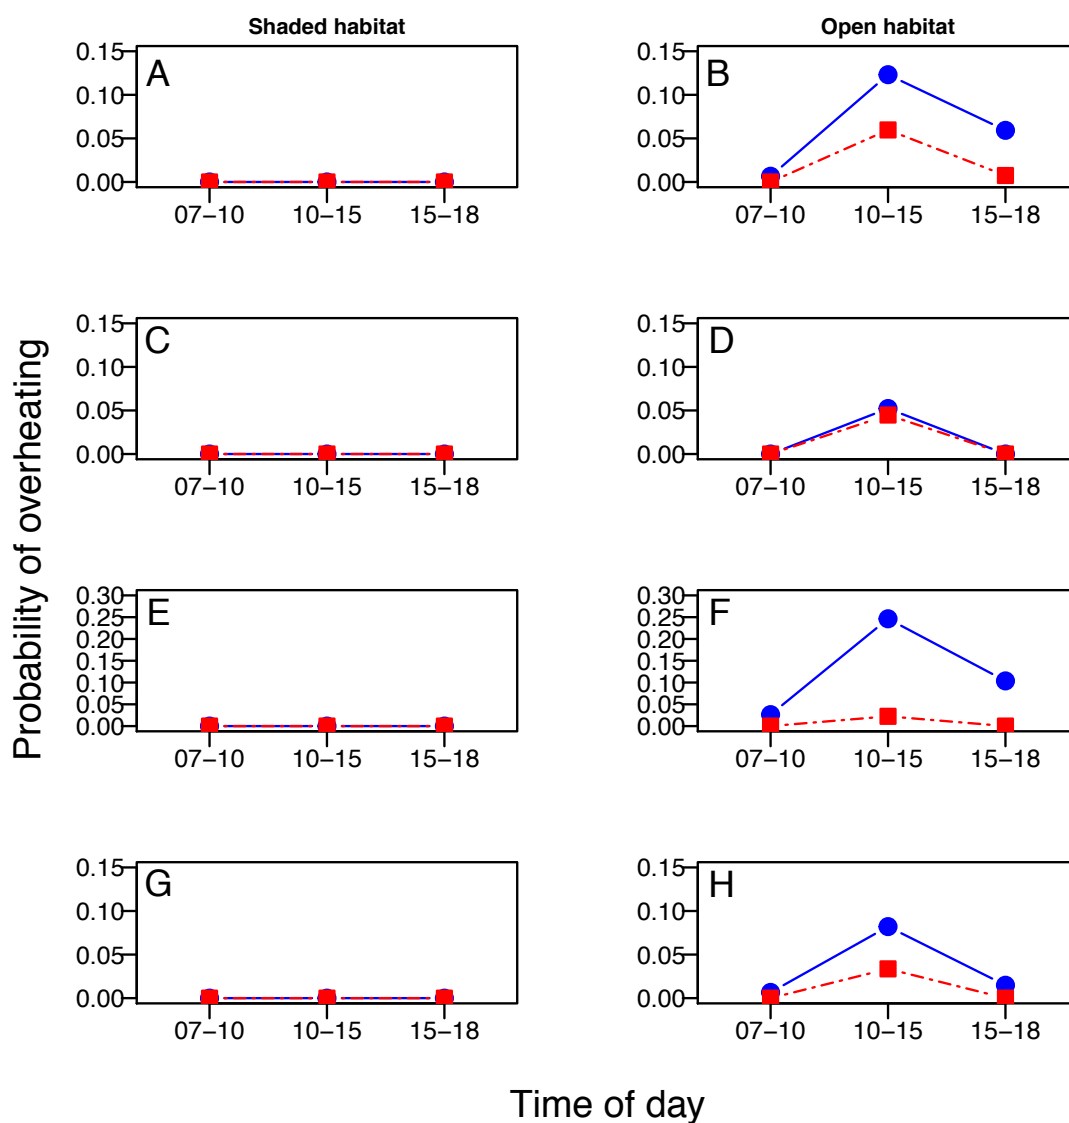

883

884

885

886

887 Figure 4

888

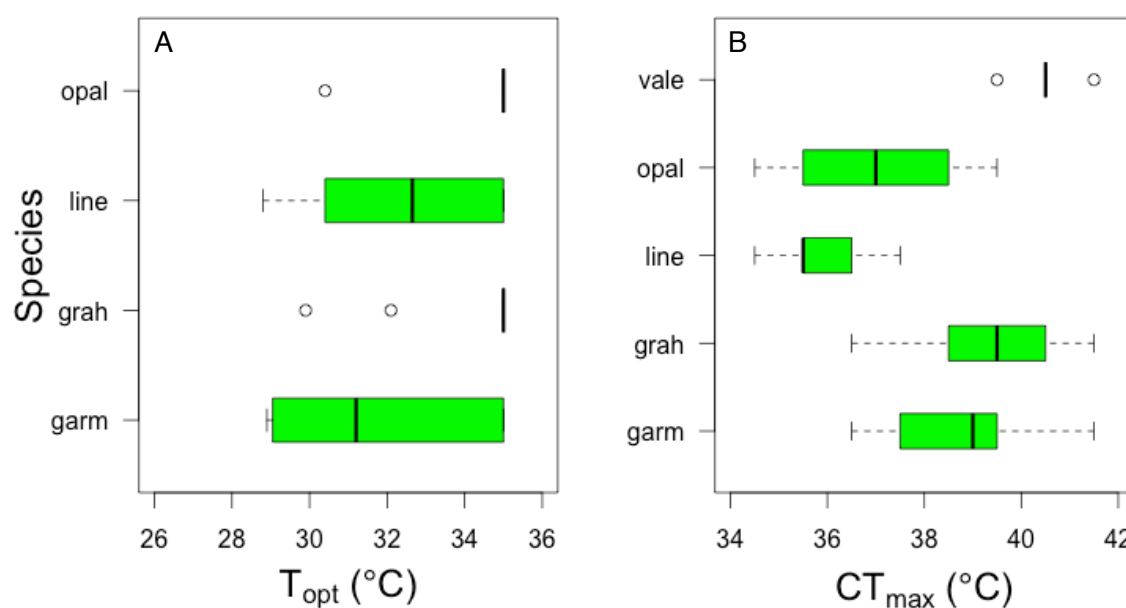

Figure 5
